# Supplementary material for: Circulating Tumor Cell Analysis in Metastatic Triple-Negative Breast Cancers
Source: Oxford University Press journal article supplement (doi:10.1158/1078-0432.ccr-14-1948), 2014-12-19
Supplement: 10780432ccr141948-sup-134386_2_supp_2748585_nf831r.docx [file 10780432ccr141948-sup-134386_2_supp_2748585_nf831r.docx]

**Supplementary Table 1.** Median overall survival (OS) and time-to-progression (TTP) in months for different groups based on CellSearch and IE/FC and circulating tumor cell positivity using two cutoffs. OS and TTP were estimated by using the Kaplan-Meier method (see Figures 2, 3 and 4). The log-rank test was used to compare OS and TTP between groups and p<0.05 was considered statistically significant. (*) Asterisk indicates a trend toward significance; ns = not statistically significant.
