# Supplementary material for: Circulating Tumor Cell Analysis in Metastatic Triple-Negative Breast Cancers
Source: Oxford University Press journal article supplement (doi:10.1158/1078-0432.ccr-14-1948), 2014-12-19
Supplement: 10780432ccr141948-sup-134386_2_supp_2748588_nf835x.docx [file 10780432ccr141948-sup-134386_2_supp_2748588_nf835x.docx]

**Supplementary Table 2.** Median overall survival (OS) and time-to-progression (TTP) in months for different groups based on CTC status. Patients were assigned to the following groups: favorable (<cutoff) and unfavorable (≥cutoff) CTC status at both time points or those who experienced a conversion in CTCs status between time points (favorable to unfavorable or vice versa). CTC levels were assessed by CellSearch and IE/FC at baseline and 7-14d after initiation of therapy. OS and TTP were estimated by using the Kaplan-Meier method to estimate the median TTP and median OS with 95%CI for each defined group (see Figure 4). The log-rank test was used to compare OS and TTP between groups and *p<*0.05 was considered statistically significant. (*) Asterisks indicate a trend toward significance; ns = not statistically significant.
