# Supplementary material for: Circulating Tumor Cell Analysis in Metastatic Triple-Negative Breast Cancers
Source: Oxford University Press journal article supplement (doi:10.1158/1078-0432.ccr-14-1948), 2014-12-19
Supplement: 10780432ccr141948-sup-134386_2_supp_2753666_nfd3tx.docx [file 10780432ccr141948-sup-134386_2_supp_2753666_nfd3tx.docx]

**Supplementary Figure Legends**

**Supplementary Figure 1.** REMARK flow diagram of patients and sample collection and processing for each enumeration method (CellSearch and IE/FC). Blood samples from 102 patients with metastatic triple-negative breast cancer were collected at baseline and 7-14days after initiation of treatment. Circulating tumor cells in patients’ blood from the same draw were contemporaneously enumerated by CellSearch and IE/FC.
